# Supplementary material for: Induction of autophagy improves embryo viability in cloned mouse embryos
Source: PubMed Central journal article supplement (PMC4672298; doi:10.1038/srep17829), 2015-12-08

**Supplemental Material to: Induction of autophagy improves embryo viability in cloned mouse embryos**

XingHui Shen,<sup>1†</sup> Na Zhang,<sup>1†</sup> ZhenDong Wang,<sup>1</sup> GuangYu Bai,<sup>1</sup> Zhong Zheng,<sup>1</sup> YanLi Gu,

<sup>1</sup> YanShuang Wu,<sup>1</sup> Hui Liu,<sup>1</sup> DongJie Zhou<sup>1</sup> and Lei Lei<sup>1\*</sup>

†The authors consider that the first two authors should be regarded as joint first authors.

\*Correspondence to: Lei Lei; Email: Leiys2002@yahoo.com

Supplementary Table 1. List of Primers used in this work.

| Gene  | Accession No. | Primer sequence (5'-3')                                | Product size | Efficiency | R <sup>2</sup> |
|-------|---------------|--------------------------------------------------------|--------------|------------|----------------|
| H2afz | NM_016750     | F: CTGAAGTAGTGGGTTTTGATTG<br>R: GGGATATGACCTTTATTGAGCT | 147          | 99.0%      | 0.998          |
| Hprt1 | NM_013556     | F: CAGCGTCGTGATTAGCG<br>R: GCCTCCCATCTCCTTCAT          | 160          | 97.3%      | 0.999          |
| Lc3   | NM_026160     | F: TTCTTCCTCCTGGTGAATGG<br>R: GTGGGTGCCTACGTTCTCAT     | 216          | 97.2%      | 0.991          |
| c-mos | NM_020021     | F: CGCCACGACAACATAGTTCG<br>R: ACCGTAGATGACTTGGTGTAGAG  | 123          | 95.7 %     | 0.998          |
| Plat  | NM_008872     | F: AACGCAGACAACCTTACCAACA<br>R: GTTCGCTGCAACTTCGGAC    | 131          | 104.6%     | 0.995          |
| Gdf9  | NM_008110     | F: GTCACCTCTACAATACCGTCCG<br>R: CACCCGGTCCAGGTAAACA    | 119          | 100.0 %    | 0.999          |
| H1oo  | NM_138311     | F: AGTTGGCAAGGCCACGATG<br>R: TGACCTCTTTCGGTTTCGCC      | 110          | 98.0%      | 0.999          |

F, forward; R, reverse.

Supplementary Table 2. The effect of rapamycin in activation medium on SCNT embryo developmental rate.

Development rate of SCNT embryo treated with rapamycin and pp242.

|           | N   | 2-Cell (%) | 4-Cell (%) | Morula (%) | Blastocyst (%) |
|-----------|-----|------------|------------|------------|----------------|
| Control   | 681 | 100        | 83.5±12.9  | 68.1±8.4   | 41.5±9.2       |
| Rapamycin | 686 | 100        | 94.6±8.3   | 81.5±7.5*  | 68.5±14.3*     |
| PP242     | 167 | 100        | 96.3±1.3*  | 78.9±6.3*  | 68.7±7.4*      |

Values were calculated as mean ± SD. \*p < 0.05.

Supplementary Figure 1. Double staining of F-actin and LC3. (A) PA embryos were stained by phalloidin (green) and LC3 anti body (red) 6h or 9h after activation. Nuclei were visualized by DAPI. RPA, rapamycin treated PA; Non-CB PA, activate without CB. Scale bar, 20µm. (B) Quantification of LC3 dots in PA embryos. Each value represents the mean ±s.e.m. \*p < 0.05; \*\*p <0.01; ns, not significant

Supplementary Figure 2. Degradation of selected maternal mRNA after activation in PA embryos. mRNA was isolated from embryos 3 h, 6 h, 9 h and 22 h after activation, Reverse-transcribed using oligo (dT) primer, and subjected to qPCR to examine the changes in the relative amounts of *c-mos*, *Plat*, *Gdf9* and *H100* mRNAs. The values of the MII oocytes were set as onefold. Three independent experiments were performed and averaged values are shown. \*p < 0.05; \*\*p <0.01.

Supplementary Figure 3. Full-length western blotting assay for conversion of LC3-I to LC3-II.

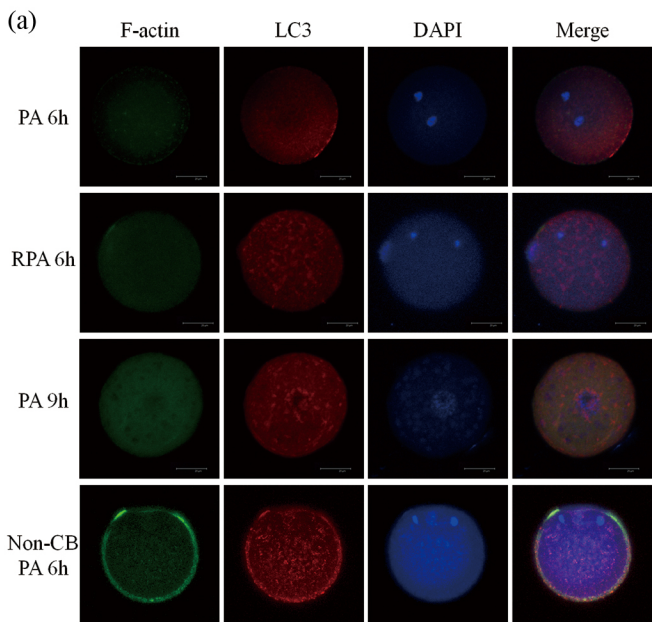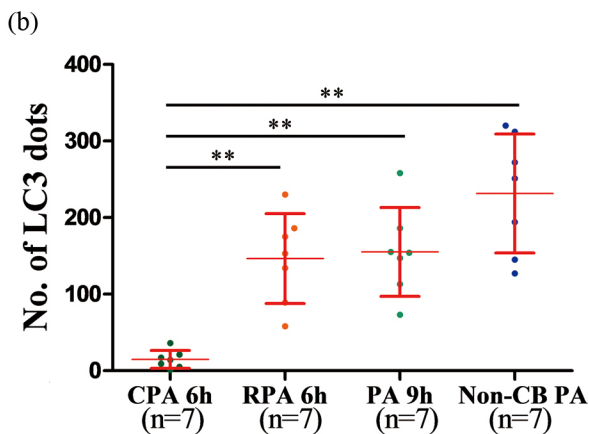

### c-mos

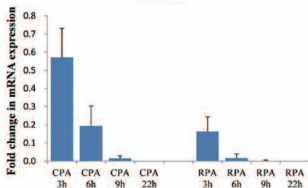

### H100

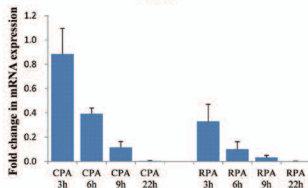

### Gdf9

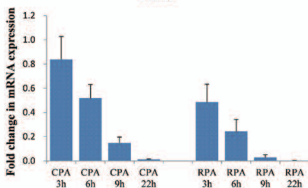

### Plat

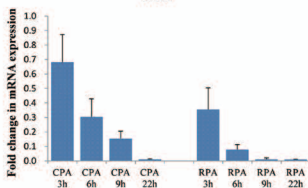

### 3h after activation

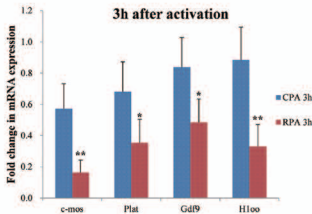

### 9h after activation

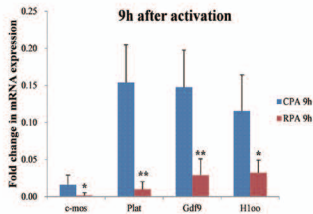

### 6h after activation

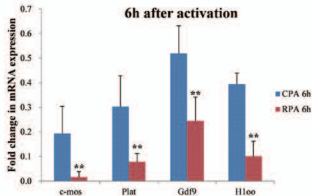

### 22h after activation

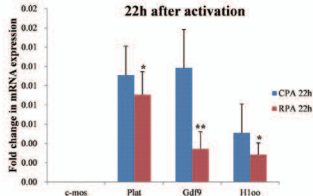

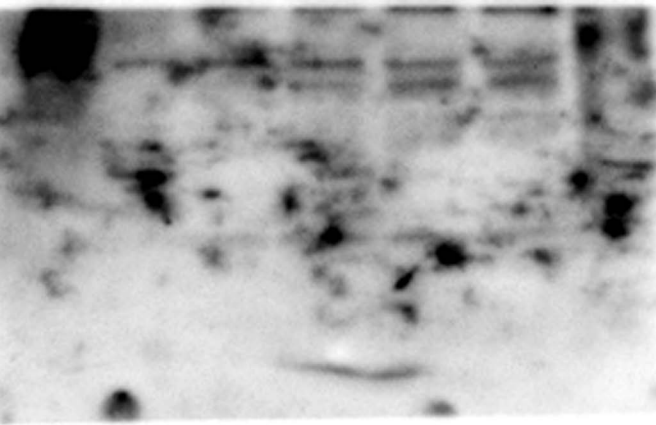

Supplement: srep17829-s1.pdf [file srep17829-s1.pdf]
